# Supplementary material for: Dementia: assessment, management and support: summary of updated NICE guidance
Source: HighWire-hosted journal article supplement (doi:10.1136/bmj.k2438), 2018-06-20

# Pharmacological management for people with dementia

This infographic summarises NICE guidance on drugs that can be offered as a part of treatment for people with the most common forms of dementia. An individualised approach is necessary owing to the wide variety of symptoms faced by each person with dementia.

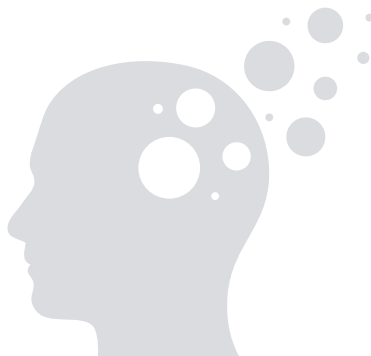

## KEY

### AChE INHIBITORS

-  Donepezil
-  Galantamine
-  Rivastigmine
-  Memantine

## ALZHEIMER'S

|                                                                      | Mild                                                                                                                                                                                                                                                                                             | Moderate                                                                                                                     | Severe                                                                                                                         |
|----------------------------------------------------------------------|--------------------------------------------------------------------------------------------------------------------------------------------------------------------------------------------------------------------------------------------------------------------------------------------------|------------------------------------------------------------------------------------------------------------------------------|--------------------------------------------------------------------------------------------------------------------------------|
| NEWLY DIAGNOSED PATIENTS                                             | Monotherapy is recommended as an option<br>   |                                                                                                                              | Monotherapy is recommended as an option<br> |
| PEOPLE INTOLERANT OF, OR WITH A CONTRAINDICATION TO, AChE INHIBITORS |                                                                                                                                                                                                                                                                                                  | Monotherapy is recommended as an option<br> |                                                                                                                                |
| PEOPLE ALREADY TAKING AN AChE INHIBITOR                              |                                                                                                                                                                                                                                                                                                  | Consider in addition<br>                    | Offer in addition<br>                       |
| Do not stop AChE inhibitors because of disease severity alone        |                                                                                                                                                                                                                                                                                                  |                                                                                                                              |                                                                                                                                |

## WHO CAN PRESCRIBE ALZHEIMER'S DRUGS?

FOR PEOPLE NOT ALREADY TAKING:    

Only start treatment on the advice of a clinician who has the necessary knowledge and skills, such as:

Secondary care medical specialists

-  Psychiatrists
-  Geriatricians
-  Neurologists

Other healthcare professionals, if they have expertise diagnosing and treating Alzheimer's disease

-  GP
-  Nurse consultant
-  Advanced nurse practitioner

Once the decision has been made to start drug therapy, the first prescription can be made in primary care

FOR PEOPLE ALREADY TAKING:   

Primary care prescribers may start treatment with  without specialist advice

## NON-ALZHEIMER'S

|                                                                                                                                                                                          | Mild                                                                                                                                                                          | Moderate                                                                                     | Severe                                                                                                                                                                               |
|------------------------------------------------------------------------------------------------------------------------------------------------------------------------------------------|-------------------------------------------------------------------------------------------------------------------------------------------------------------------------------|----------------------------------------------------------------------------------------------|--------------------------------------------------------------------------------------------------------------------------------------------------------------------------------------|
| People with DEMENTIA WITH LEWY BODIES                                                                                                                                                    |                                                                                                                                                                               |                                                                                              |                                                                                                                                                                                      |
| No contraindications                                                                                                                                                                     | Offer   |                                                                                              | Consider   |
|  and  not tolerated |                                                                                                                                                                               | Consider  |                                                                                                                                                                                      |
| AChE inhibitors contraindicated                                                                                                                                                          |                                                                                                                                                                               | Consider  |                                                                                                                                                                                      |

### People with VASCULAR DEMENTIA

Only consider:     if they have suspected comorbid:

-  Alzheimer's disease
-  Parkinson's disease
-  Dementia with Lewy bodies

### People with FRONTOTEMPORAL DEMENTIA or COGNITIVE IMPAIRMENT CAUSED BY MULTIPLE SCLEROSIS

DO NOT OFFER    

### People with PARKINSON'S DISEASE DEMENTIA

For guidance on pharmacological management, see *Parkinson's disease dementia* in the NICE guideline on Parkinson's disease

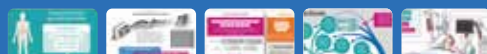

Supplement: Dementia_v19_web.pdf [file Dementia_v19_web.pdf]
